# Supplementary material for: A Comprehensive MicroRNA Expression Profile Related to Hypoxia Adaptation in the Tibetan Pig
Source: PubMed Central journal article supplement (PMC4646468; doi:10.1371/journal.pone.0143260), 2015-11-16
Supplement: pone.0143260.s004.pdf [file pone.0143260.s004.pdf]

# MAPK SIGNALING PATHWAY

A

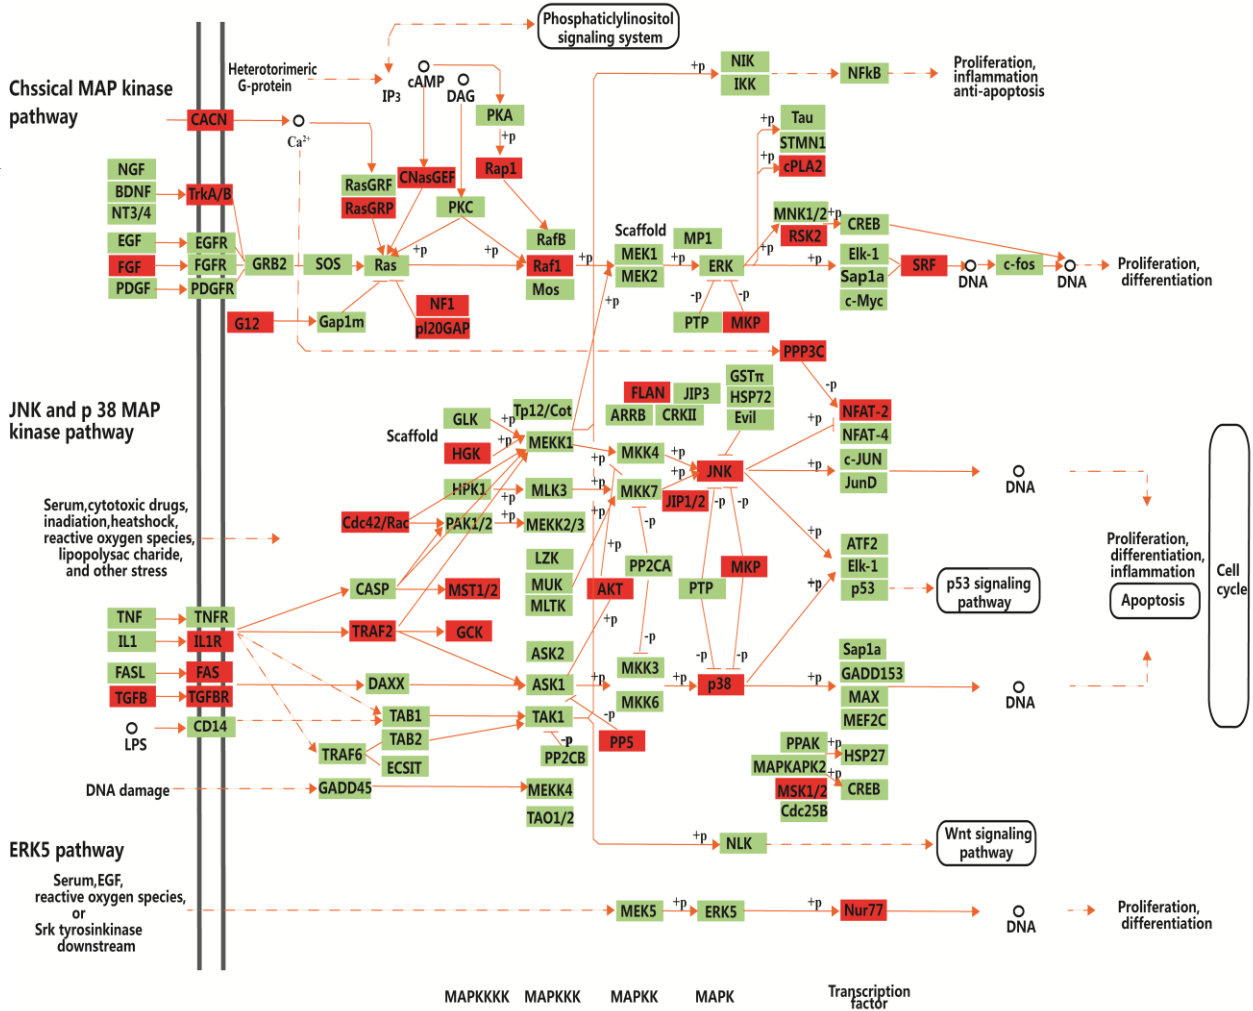

# MAPK SIGNALING PATHWAY

B

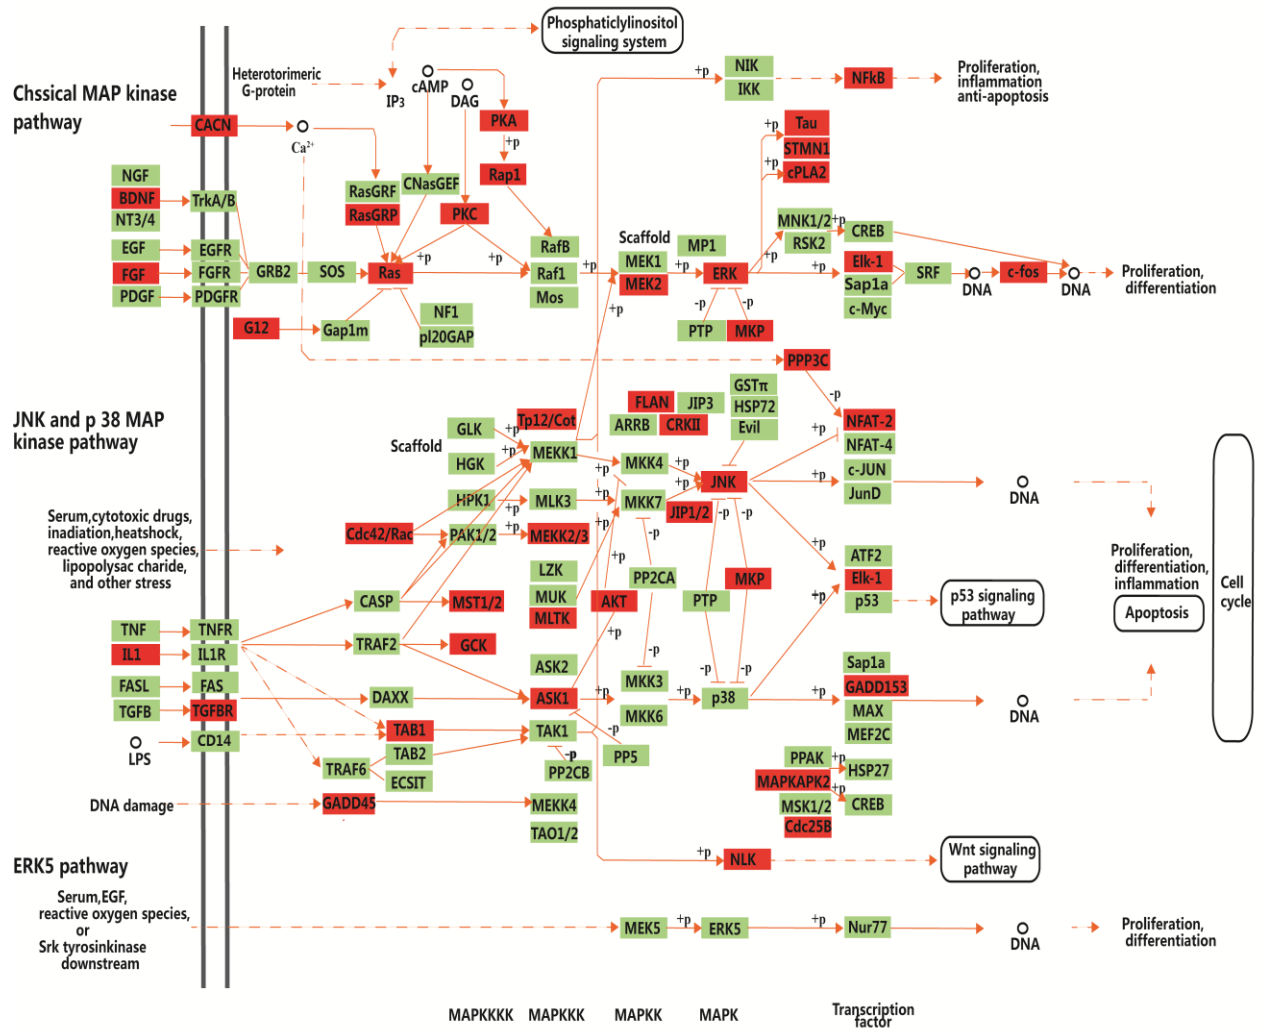

**S4 Fig. Mitogen-activated protein kinase (MAPK) signaling pathway enriched by 47 putative target genes of upregulated miRNAs (A) and 53 putative target genes of downregulated miRNAs (B). Red boxes represent the target genes of miRNAs.**
